# Supplementary material for: Attenuation of toxicity and occurrence of degradation products of the fungicide tebuconazole after combined vacuum UV and UVC treatment of drinking water
Source: PubMed Central journal article supplement (PMC9395489; doi:10.1007/s11356-022-19691-0), 2022-04-02
Supplement: 11356_2022_19691_MOESM1_ESM.pdf [file 11356_2022_19691_MOESM1_ESM.pdf]

## Supplementary material

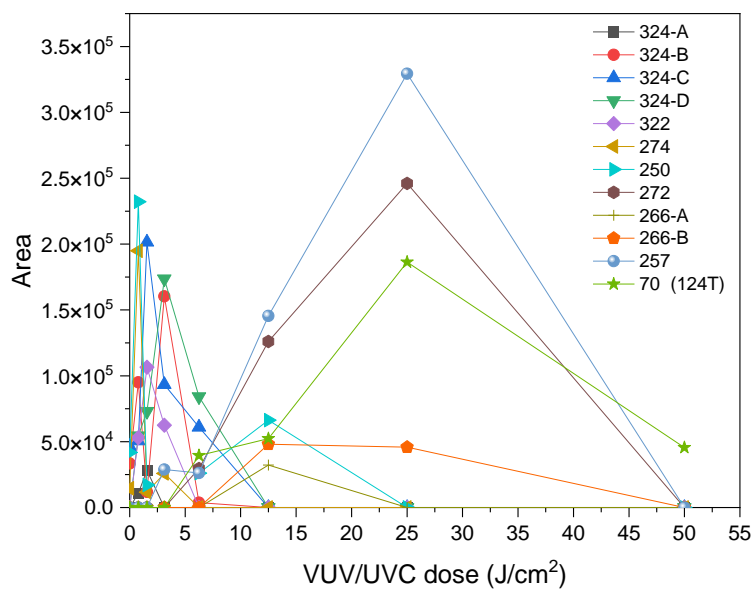

**Fig. S1** Transformation products of aqueous TEB samples identified by LC-HRMS after VUV irradiation. Transformation products are denoted by their mass-to-charge ( $m/z$ ) ratio. 124T refers to 1,2,4-triazole.
